# Supplementary material for: The effect of cyclodextrin complexation on the solubility and photostability of nerolidol as pure compound and as main constituent of cabreuva essential oil
Source: publisher site journal article supplement (doi:10.3762/bjoc.13.84), 2017-05-05
Supplement: Additional file 1 [file 1860-5397-13-84-S1.pdf]

## Supporting Information

for

# The effect of cyclodextrin complexation on the solubility and photostability of nerolidol as pure compound and as main constituent of cabreuva essential oil

Joyce Azzi<sup>1,2</sup>, Pierre-Edouard Danjou<sup>2</sup>, David Landy<sup>2</sup>, Steven Ruellan<sup>2</sup>, Lizette Auezova<sup>1</sup>, H el ene Greige-Gerges<sup>1</sup> and Sophie Fourmentin<sup>\*2</sup>

Address: <sup>1</sup>Bioactive Molecules Research Group, Doctoral School of Sciences and Technologies, Faculty of Sciences, Jdaidet El-Matn, Lebanese University, Lebanon and <sup>2</sup>Unit e de Chimie Environnementale et Interactions sur le Vivant (UCEIV, EA 4492), SFR Condorcet FR CNRS 3417, ULCO, F-59140 Dunkerque, France.

Email: Sophie Fourmentin - [lamotte@univ-littoral.fr](mailto:lamotte@univ-littoral.fr)

\*Corresponding author

### <sup>1</sup>H NMR spectra

(a)

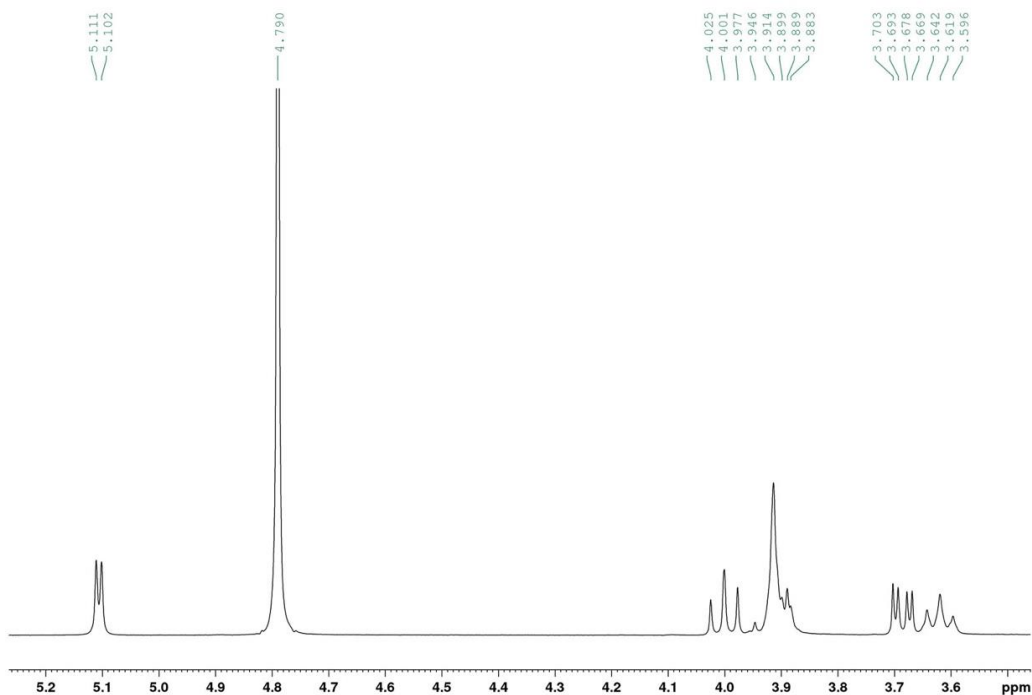

(b)

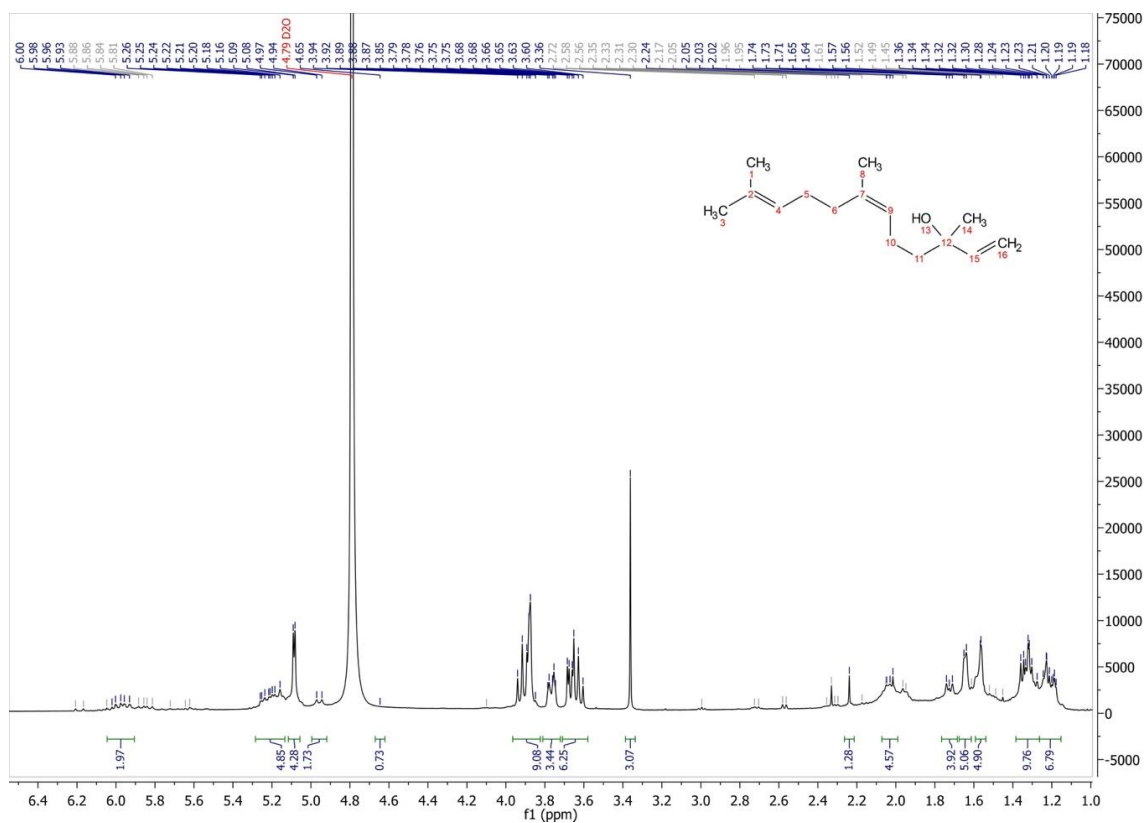

**Figure 1:**  $^1\text{H}$  RMN spectra for  $\beta$ -CD (a) and  $\beta$ -CD/trans-Ner inclusion complex (b) solutions in  $\text{D}_2\text{O}$ .
